# Supplementary material
Source: publisher figshare collection journal article supplement (https://wiley.figshare.com/articles/dataset/_/3528704)
Supplement: Supplementary file 1 [file 1]

*Ecological Archives* E088-196-A1

**Christophe Bonenfant, Jean-Michel Gaillard, Stéphane Dray, Anne Loison, Manuela Royer, and Daniel Chessel. 2007. Testing sexual segregation and aggregation: Old ways are best. *Ecology* 88:3202–3208.**

Appendix A. Link between the sexual segregation and aggregation statistic (SSAS) and the segregation coefficient (SC).

## APPENDIX A

### LINK BETWEEN SSAS AND SC

The data consist of  $N$  individuals ( $X$  males and  $Y$  females) distributed in  $k$  groups. There are  $N_i$  individuals in the  $i$ -th group:  $X_i$  males and  $Y_i$  females. Data are organised in a 2 by  $k$  contingency table. The traditional  $\chi^2$  statistic computed on this contingency table is given by:

$$\mathbf{X}^2 = \sum_{i=1}^k \left( \frac{(X_i - X N_i/N)^2}{X N_i/N} + \frac{(Y_i - Y N_i/N)^2}{Y N_i/N} \right)$$

We can then develop this equation as follows:

$$\begin{aligned} \mathbf{X}^2 &= \sum_{i=1}^k \left( \frac{X_i^2 - 2X_i X N_i/N + X^2 N_i^2/N^2}{X N_i/N} + \frac{Y_i^2 - 2Y_i Y N_i/N + Y^2 N_i^2/N^2}{Y N_i/N} \right) \\ &= \sum_{i=1}^k \left( \frac{X_i^2}{X N_i/N} - 2X_i + X N_i/N + \frac{Y_i^2}{Y N_i/N} - 2Y_i + Y N_i/N \right) \end{aligned}$$

Using that  $N = X + Y$ ,  $X = \sum_{i=1}^k X_i$  and  $Y = \sum_{i=1}^k Y_i$ , we get :

$$\begin{aligned} \mathbf{X}^2 &= \sum_{i=1}^k \left( \frac{X_i^2}{X N_i/N} + \frac{Y_i^2}{Y N_i/N} \right) - N \\ &= N \left[ \sum_{i=1}^k \left( \frac{Y X_i N_i + X Y_i N_i - N Y_i X_i}{X Y N_i} \right) - 1 \right] \\ &= N \left[ \sum_{i=1}^k \left( \frac{X_i}{X} \right) + \sum_{i=1}^k \left( \frac{Y_i}{Y} \right) - \frac{N}{XY} \sum_{i=1}^k \left( \frac{X_i Y_i}{N_i} \right) - 1 \right] \\ &= N \left[ 1 - \frac{N}{XY} \sum_{i=1}^k \frac{Y_i X_i}{N_i} \right] \end{aligned}$$

Consequently,  $SSAS = \frac{\mathbf{X}^2}{N}$ . The original formula of the segregation coefficient being

$SC = 1 - \frac{N}{XY} \sum_{i=1}^k \frac{X_i Y_i}{N_i - 1}$ , is intimately linked to the  $\mathbf{X}^2/N$  statistic.
